# Supplementary material for: OffsampleAI: artificial intelligence approach to recognize off-sample mass spectrometry images
Source: PubMed Central journal article supplement (PMC7119286; doi:10.1186/s12859-020-3425-x), 2020-04-03
Supplement: 12859_2020_3425_MOESM2_ESM.pdf [file 12859_2020_3425_MOESM2_ESM.pdf]

## Supplementary Tables

| <b>Dataset</b>                         | <b>Tagger-curator average</b> | <b>Inter-tagger pairwise average</b> |
|----------------------------------------|-------------------------------|--------------------------------------|
| 70%meoh_8cyc_75um                      | 1.0                           | 0.86                                 |
| DESI quan_Swales                       | 0.97                          | 0.95                                 |
| ICL//A51 CT S3-centroid                | 1.0                           | 0.93                                 |
| Mousebrain_MG08_2017_GruppeA           | 0.99                          | 0.98                                 |
| Servier_Ctrl_mouse_wb_median_plane_DHB | 0.89                          | 0.71                                 |
| <b>Average</b>                         | <b>0.97</b>                   | <b>0.89</b>                          |

**Supplementary Table S1. Agreement between the taggers and the curator for the five selected datasets from the gold standard.** The datasets were selected to be among the most difficult datasets to tag. Cohen's  $\kappa$  was used to estimate the agreement. The tagger-curator average shows how well the taggers agree with the curated tags. The inter-tagger pairwise average shows the average pairwise agreement between taggers without considering the curated tags.

|                               | <b>Tagger1</b> | <b>Tagger2</b> | <b>Tagger3</b> | <b>Tagger4</b> | <b>Tagger5</b> |
|-------------------------------|----------------|----------------|----------------|----------------|----------------|
| <b>Tagger-curator average</b> | 0.95           | 0.95           | 0.99           | 0.97           | 0.96           |
| <b>Inter-tagger average</b>   | 0.88           | 0.92           | 0.92           | 0.93           | 0.74           |

**Supplementary Table S2.** Detailed investigation of the five taggers with respect to their agreement with the curator as well as between each other. For each tagger, Cohen-kappa agreement of the tagger with the curator and average pairwise inter-tagger agreement is shown.

|                                                                               | off-sample       |                  |                  | on-sample        |                  |                  |
|-------------------------------------------------------------------------------|------------------|------------------|------------------|------------------|------------------|------------------|
|                                                                               | F1               | P                | R                | F1               | P                | R                |
| Spatio-molecular biclustering                                                 | .93<br>(+/- .10) | .92<br>(+/- .10) | .94<br>(+/- .11) | .95<br>(+/- .06) | .95<br>(+/- .06) | .95<br>(+/- .06) |
| Semi-automated spatio-molecular biclustering, clusters curated for 2 datasets | .96<br>(+/- .03) | .96<br>(+/- .07) | .96<br>(+/- .04) | .97<br>(+/- .01) | .97<br>(+/- .03) | .97<br>(+/- .03) |

**Supplementary Table S3. Performance of the unsupervised spatio-molecular biclustering method.**

F1-measure (F), precision (P), and recall (R) were calculated on the gold standard of 23238 images. For each measure, we show the average and confidence intervals (+- two standard deviations) over five folds of the cross validation.

|                                                      | off-sample       |                  |                  | on-sample        |                  |                  |
|------------------------------------------------------|------------------|------------------|------------------|------------------|------------------|------------------|
|                                                      | F1               | P                | R                | F1               | P                | R                |
| Molecular co-localization method, full gold standard | .90<br>(+/- .07) | .95<br>(+/- .08) | .86<br>(+/- .15) | .93<br>(+/- .05) | .91<br>(+/- .11) | .96<br>(+/- .07) |
| Molecular co-localization method, DHB positive data  | .96<br>(+/- .06) | .96<br>(+/- .08) | .96<br>(+/- .06) | .95<br>(+/- .09) | .95<br>(+/- .07) | .94<br>(+/- .12) |

**Supplementary Table S4. Performance of the molecular co-localization method.**

F1-score (F1), precision (P), and recall (R) are shown. The method was evaluated on the full gold standard of 23238 images, as well as on a reduced set of the gold standard MALDI-imaging datasets acquired using the 2,5-dihydroxybenzoic acid (DHB) matrix in the positive ion mode. For each measure, we show the average and confidence intervals (+- two standard deviations) over five folds of the cross-validation.

| Matrix cluster             | Molecular formula | Absolute frequency | Relative frequency |
|----------------------------|-------------------|--------------------|--------------------|
| 1*M+2*(M-H2O)-0*H+0*K+0*Na | C21H14O10         | 28                 | 90%                |
| 1*M+2*(M-H2O)-1*H+0*K+1*Na | C21H13NaO10       | 28                 | 90%                |
| 1*M+1*(M-H2O)-0*H+0*K+0*Na | C14H10O7          | 27                 | 87%                |
| 1*M+1*(M-H2O)-1*H+0*K+1*Na | C14H9NaO7         | 27                 | 87%                |
| 1*M+1*(M-H2O)-2*H+0*K+2*Na | C14H8Na2O7        | 27                 | 87%                |
| 0*M+2*(M-H2O)-1*H+0*K+1*Na | C14H7NaO6         | 26                 | 84%                |
| 0*M+4*(M-H2O)-0*H+0*K+0*Na | C28H16O12         | 26                 | 84%                |
| 0*M+3*(M-H2O)-0*H+0*K+0*Na | C21H12O9          | 25                 | 81%                |
| 1*M+3*(M-H2O)-1*H+0*K+1*Na | C28H17NaO13       | 25                 | 81%                |
| 1*M+3*(M-H2O)-0*H+0*K+0*Na | C28H18O13         | 24                 | 77%                |

**Supplementary Table S5. Most frequently annotated and recognized DHB matrix clusters.** In the matrix cluster formula, M stands for the molecular formula of the DHB matrix (C<sub>7</sub>H<sub>6</sub>O<sub>4</sub>). The absolute/relative frequencies stand for the number/percentage of datasets (out of 31 selected gold standard datasets) in which a particular matrix cluster was annotated by METASPACE with an FDR ≤50% with an ion image recognized as off-sample.

|                                                   | off-sample       |                  |                  | on-sample        |                  |                  |
|---------------------------------------------------|------------------|------------------|------------------|------------------|------------------|------------------|
|                                                   | F1               | P                | R                | F1               | P                | R                |
| Template-based method, 4 templates                | .92<br>(+/- .14) | .93<br>(+/- .09) | .91<br>(+/- .20) | .95<br>(+/- .06) | .94<br>(+/- .10) | .96<br>(+/- .03) |
| Semi-automated template-based method, 4 templates | .96<br>(+/- .06) | .98<br>(+/- .02) | .94<br>(+/- .13) | .97<br>(+/- .04) | .96<br>(+/- .09) | .98<br>(+/- .01) |
| Semi-automated template-based method, 2 templates | .95<br>(+/- .07) | .97<br>(+/- .03) | .93<br>(+/- .14) | .96<br>(+/- .05) | .95<br>(+/- .09) | .98<br>(+/- .02) |

**Supplementary Table S6. Performance of the template-based classifier.** F1-score (F), precision (P), and recall (R) were calculated on the gold standard of 23238 images. For each measure, we show the average and confidence intervals (+/- two standard deviations) over five folds of the cross validation.
